# Supplementary material for: Poor Immunogenicity, Not Vaccine Strain Egg Adaptation, May Explain the Low H3N2 Influenza Vaccine Effectiveness in 2012–2013
Source: PubMed Central journal article supplement (PMC6051447; doi:10.1093/cid/ciy097), 2018-02-20

**Pre-vacc. 3C.2**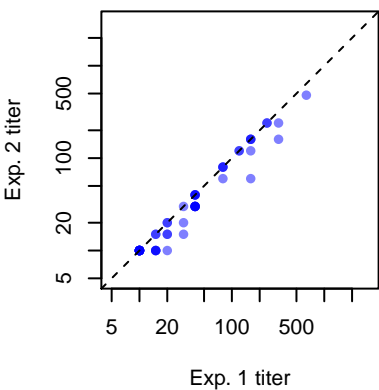**Post-vacc. 3C.2**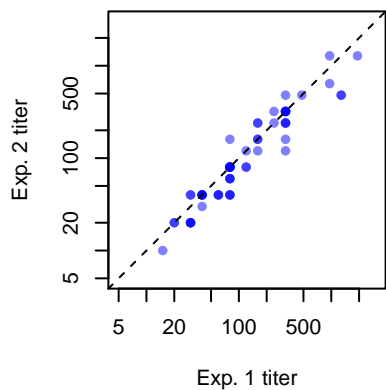**Pre-vacc. 3C.3**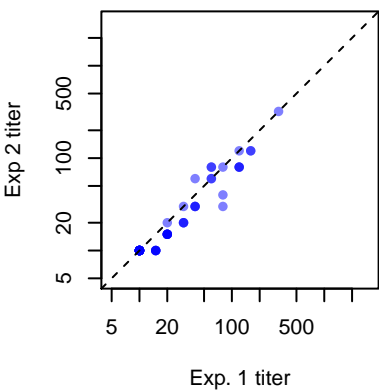**Post-vacc. 3C.3**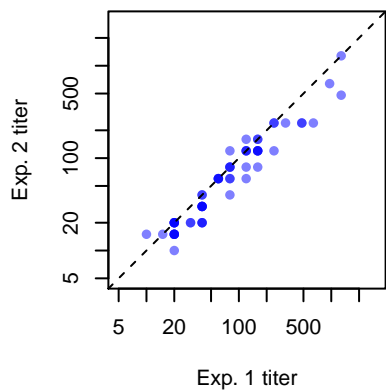**Pre-vacc. Vic WT**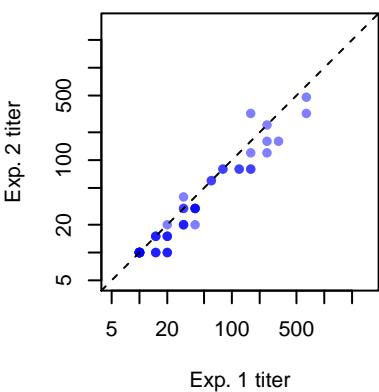**Post-vacc. Vic WT**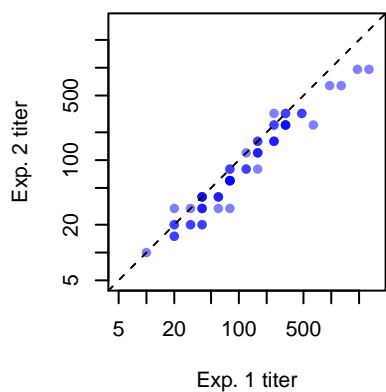**Pre-vacc. IVR-165**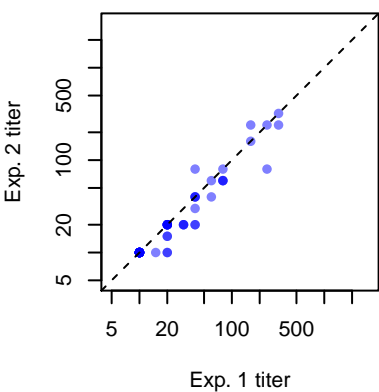**Post-vacc. IVR-165**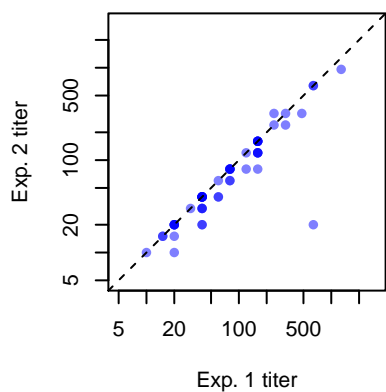

Supplement: ciy097_suppl_supplemental_figure_s2.pdf [file ciy097_suppl_supplemental_figure_s2.pdf]
