# Supplementary material for: Poor Immunogenicity, Not Vaccine Strain Egg Adaptation, May Explain the Low H3N2 Influenza Vaccine Effectiveness in 2012–2013
Source: PubMed Central journal article supplement (PMC6051447; doi:10.1093/cid/ciy097), 2018-02-20

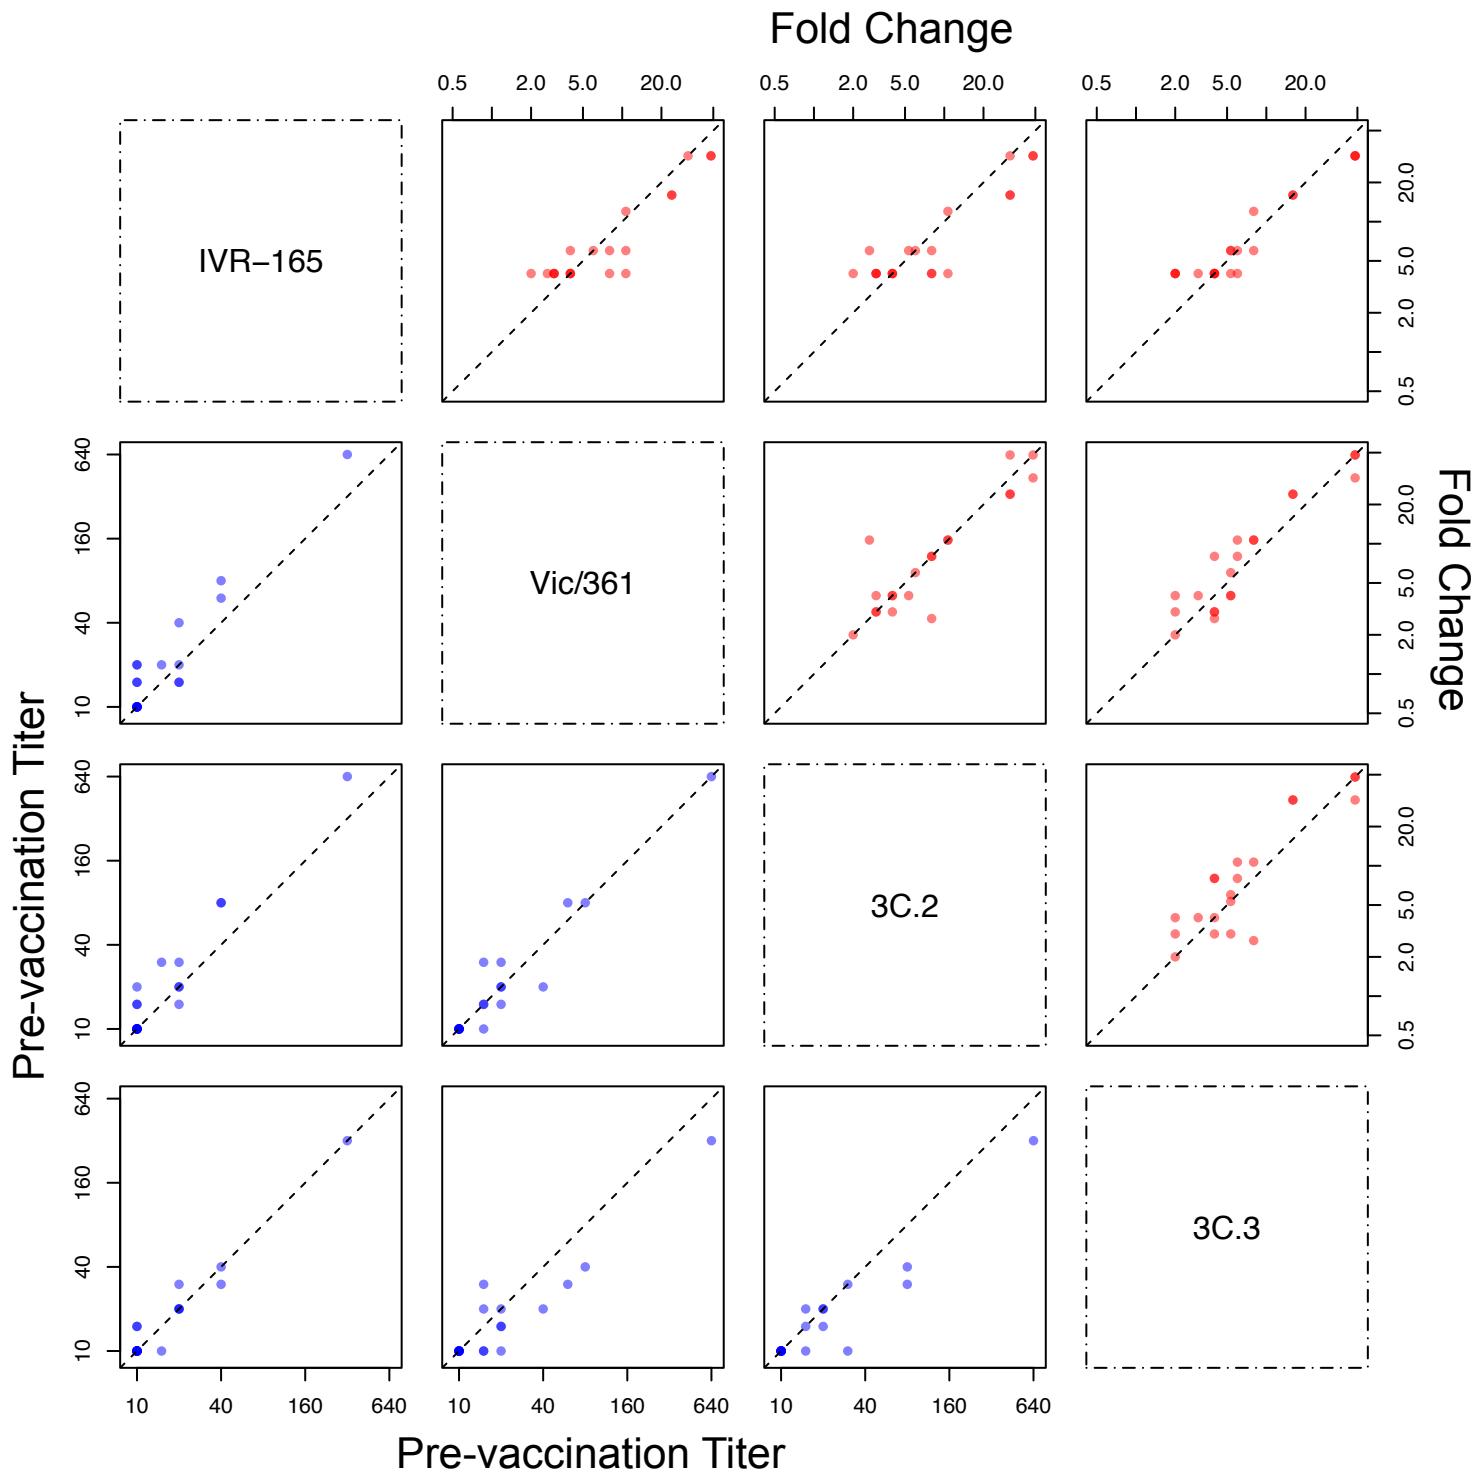

Supplement: ciy097_suppl_supplemental_figure_s4.pdf [file ciy097_suppl_supplemental_figure_s4.pdf]
